# Supplementary material for: Atomistic simulation studies of ionic cyanine dyes: self-assembly and aggregate formation in aqueous solution
Source: Royal Society of Chemistry journal article supplement (doi:10.1039/d0cp06205g), 2021-01-01
Supplement: d0cp06205g1.pdf [file d0cp06205g1.pdf]

# Electronic Supplementary Information

**Atomistic simulation studies of ionic cyanine dyes: self-assembly  
and aggregate formation in aqueous solution**

Gary Yu, Martin Walker and Mark R. Wilson

*Department of Chemistry, Durham University, Durham, UK*

Table 1: Optimised Ryckaert-Bellemans coefficients,  $C_n$  ( $\text{kJ mol}^{-1}$ ), obtained from fitting to DFT data for PIC.

| Dihedral | $C_0$    | $C_1$     | $C_2$     | $C_3$    | $C_4$    | $C_5$     |
|----------|----------|-----------|-----------|----------|----------|-----------|
| $\phi$   | 42.00000 | -26.00000 | -74.00000 | 16.00000 | 57.00000 | -11.00000 |

Table 2: Optimised Ryckaert-Bellemans coefficients,  $C_n$  ( $\text{kJ mol}^{-1}$ ), obtained from fitting to DFT data for PCYN.

| Dihedral | $C_0$    | $C_1$    | $C_2$      | $C_3$     | $C_4$    | $C_5$    |
|----------|----------|----------|------------|-----------|----------|----------|
| $\phi_1$ | 58.00000 | 16.00000 | -116.00000 | -21.00000 | 74.00000 | 21.00000 |
| $\phi_2$ | 88.00000 | 28.00000 | -158.00000 | -60.00000 | 82.00000 | 23.00000 |

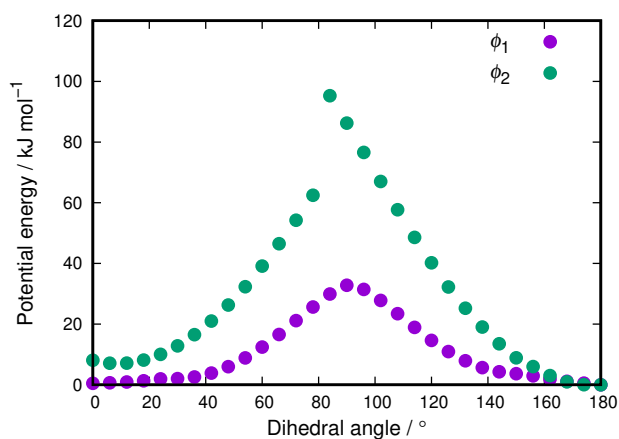

Figure 1: Calculated dihedral potentials (DFT, B3LYP/6-31+G\*) for TTBC.

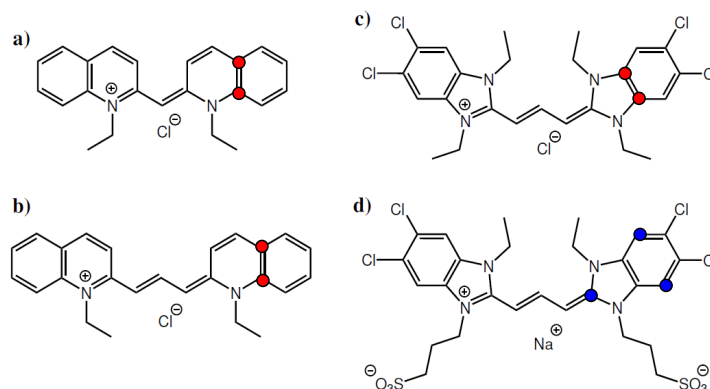

Figure 2: Atoms used to define the vector (red) and the plane (blue) for analysis of the aggregates for (a) PIC, (b) PCYN, (c) TTBC and (d) BIC.

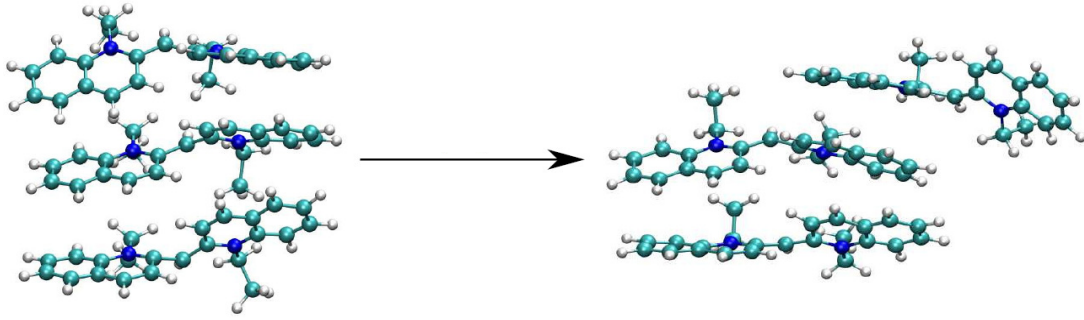

Figure 3: Snapshots of trimer structures along the reaction coordinate for PIC. Tetramer structures are identical where an additional molecule is present in the stack.

Table 3: Atomic charges obtained by the CHELPG method for PIC.

| Atom | Charge    | Atom | Charge    |
|------|-----------|------|-----------|
| C    | 0.406421  | C12  | 0.431797  |
| C1   | -0.175063 | N1   | -0.321220 |
| C2   | -0.110457 | C13  | 0.241331  |
| C3   | 0.085208  | C14  | 0.090561  |
| C4   | 0.248879  | C15  | -0.090746 |
| N    | -0.315935 | C16  | -0.204636 |
| C5   | -0.213924 | H11  | 0.112617  |
| C6   | -0.053032 | H12  | 0.254901  |
| C7   | -0.063033 | C17  | 0.232796  |
| C8   | -0.154096 | H13  | -0.012589 |
| H    | 0.154937  | C18  | -0.030561 |
| H1   | 0.115214  | H14  | 0.003643  |
| H2   | 0.116736  | H15  | -0.003272 |
| H3   | 0.125131  | H16  | 0.011856  |
| H4   | 0.109734  | H17  | 0.037411  |
| H5   | 0.147987  | H18  | 0.139614  |
| C9   | 0.240836  | C19  | -0.183815 |
| H6   | 0.006068  | C20  | -0.214720 |
| C10  | -0.067320 | C21  | -0.033501 |
| H7   | -0.015132 | H19  | 0.132365  |
| H8   | 0.022332  | C22  | -0.056758 |
| H9   | 0.010087  | H20  | 0.154884  |
| H10  | 0.046111  | H21  | 0.111670  |
| C11  | -0.576261 | H22  | 0.104943  |

Table 4: Atomic charges obtained by the CHELPG method for PCYN.

| Atom | Charge    | Atom | Charge    |
|------|-----------|------|-----------|
| C    | -0.064556 | C14  | 0.376907  |
| C1   | -0.028564 | C15  | -0.244071 |
| C2   | -0.161221 | N1   | -0.275841 |
| C3   | 0.055492  | C16  | -0.062166 |
| C4   | 0.255572  | C17  | 0.053702  |
| C5   | -0.244007 | C18  | 0.258436  |
| C6   | -0.064506 | C19  | -0.160877 |
| C7   | -0.240908 | C20  | -0.064786 |
| C8   | 0.374592  | C21  | -0.028482 |
| N    | -0.271749 | C22  | -0.244595 |
| C9   | 0.168669  | C23  | 0.170746  |
| C10  | -0.107179 | C24  | -0.106432 |
| H    | 0.112704  | H11  | 0.178015  |
| H1   | 0.106351  | H12  | 0.088207  |
| H2   | 0.131636  | H13  | 0.175042  |
| H3   | 0.162467  | H14  | 0.148085  |
| H4   | 0.128518  | H15  | 0.128144  |
| H5   | 0.147484  | H16  | 0.131598  |
| H6   | 0.014912  | H17  | 0.112766  |
| H7   | 0.021882  | H18  | 0.106399  |
| H8   | 0.035487  | H19  | 0.162540  |
| H9   | 0.028888  | H20  | 0.014810  |
| H10  | 0.056610  | H21  | 0.021314  |
| C11  | -0.365182 | H22  | 0.035024  |
| C12  | 0.048526  | H23  | 0.028948  |
| C13  | -0.361720 | H24  | 0.056369  |

Table 5: Atomic charges obtained by the CHELPG method for TTBC.

| Atom | Charge    | Atom | Charge    |
|------|-----------|------|-----------|
| C    | 0.058872  | H11  | 0.056588  |
| C1   | -0.157108 | H12  | 0.054750  |
| C2   | 0.090726  | N2   | -0.323413 |
| C3   | 0.204938  | N3   | -0.243968 |
| C4   | -0.219045 | C15  | 0.090633  |
| C5   | 0.093157  | C16  | 0.204977  |
| CL   | -0.061145 | C17  | 0.216069  |
| H    | 0.140494  | C18  | 0.275597  |
| H1   | 0.153738  | C19  | -0.078444 |
| CL1  | -0.062598 | H13  | -0.019097 |
| N    | -0.243900 | H14  | 0.022861  |
| N1   | -0.323515 | H15  | 0.016363  |
| C6   | 0.422504  | H16  | 0.030875  |
| C7   | 0.215884  | C20  | -0.157073 |
| H2   | -0.009895 | C21  | -0.219096 |
| C8   | -0.124416 | C22  | 0.058825  |
| C9   | 0.275791  | C23  | 0.093251  |
| C10  | -0.078355 | H17  | 0.140490  |
| H3   | 0.022798  | CL2  | -0.061137 |
| H4   | -0.019154 | H18  | 0.153751  |
| H5   | 0.030856  | CL3  | -0.062642 |
| H6   | 0.016352  | H19  | 0.022542  |
| C11  | -0.476898 | H20  | 0.042349  |
| C12  | 0.137129  | H21  | 0.042400  |
| C13  | -0.476894 | C24  | -0.124347 |
| C14  | 0.422501  | H22  | -0.009995 |
| H7   | 0.202191  | H23  | 0.030340  |
| H8   | 0.145142  | H24  | 0.056538  |
| H9   | 0.202205  | H25  | 0.054716  |
| H10  | 0.030370  | H26  | 0.022572  |

Table 6: Atomic charges obtained by the CHELPG method for BIC.

| Atom | Charge    | Atom | Charge    |
|------|-----------|------|-----------|
| C    | 0.067397  | H12  | 0.009304  |
| C1   | -0.181154 | H13  | 0.091486  |
| C2   | 0.151632  | H14  | 0.031045  |
| C3   | 0.155981  | N2   | -0.304602 |
| C4   | -0.195142 | N3   | -0.326748 |
| C5   | 0.066943  | C16  | 0.127943  |
| CL   | -0.105440 | C17  | 0.193224  |
| H    | 0.149297  | C18  | 0.360675  |
| H1   | 0.152082  | H15  | 0.005199  |
| CL1  | -0.107032 | H16  | -0.032853 |
| N    | -0.307166 | C19  | -0.180015 |
| N1   | -0.302551 | H17  | 0.007264  |
| C6   | 0.463820  | H18  | 0.005199  |
| C7   | 0.296191  | C20  | 0.125904  |
| H2   | 0.018913  | C21  | 0.227289  |
| C8   | -0.178705 | C22  | -0.282220 |
| C9   | 0.143862  | S1   | 1.065557  |
| C10  | 0.185190  | O3   | -0.650114 |
| C11  | -0.324051 | O4   | -0.611391 |
| S    | 1.065534  | O5   | -0.624066 |
| O    | -0.618861 | H19  | 0.011372  |
| O1   | -0.654074 | H20  | 0.028908  |
| O2   | -0.612995 | H21  | -0.029283 |
| H3   | 0.022031  | H22  | -0.064671 |
| H4   | 0.014689  | H23  | 0.066456  |
| H5   | -0.007247 | H24  | 0.068285  |
| H6   | -0.038304 | C23  | -0.171408 |
| H7   | 0.078357  | C24  | -0.223350 |
| H8   | 0.081887  | C25  | 0.052632  |
| C12  | -0.494158 | C26  | 0.082514  |
| C13  | 0.376963  | H25  | 0.152482  |
| C14  | -0.509125 | CL2  | -0.102736 |
| C15  | 0.462581  | H26  | 0.158037  |
| H9   | 0.174693  | CL3  | -0.109103 |
| H10  | 0.017539  | H27  | 0.071267  |
| H11  | 0.177585  | H28  | 0.083356  |
